# Supplementary material for: Pregnancy complications and birth outcomes following low-level exposure to per- and polyfluoroalkyl substances in the vitamin D antenatal asthma reduction trial
Source: Royal Society of Chemistry journal article supplement (doi:10.1039/d4va00001c), 2024-01-01
Supplement: d4va00001c1.pdf [file d4va00001c1.pdf]

## **Pregnancy complications and birth outcomes following low-level exposure to per- and polyfluoroalkyl substances in the Vitamin D Antenatal Asthma Reduction Trial**

**Authors:** Sofina Begum<sup>1,2</sup>, Nicole Prince<sup>1</sup>, Lidia Mínguez-Alarcón<sup>1,3</sup>, Yulu Chen<sup>1</sup>, Djøra I. Soeteman<sup>1,4</sup>, Vrushali Fangal<sup>1</sup>, Mengna Huang<sup>1</sup>, Craig Wheelock<sup>5</sup>, Scott T. Weiss<sup>1</sup>, Jessica Lasky-Su<sup>1</sup>, Rachel S Kelly<sup>1\*</sup>

<sup>1</sup>*Channing Division of Network Medicine, Brigham and Women's Hospital and Harvard Medical School, Boston, MA, USA*

<sup>2</sup>*Department of Metabolism, Digestion and Reproduction, Faculty of Medicine, Imperial College London, London, United Kingdom*

<sup>3</sup>*Department of Environmental Health, Harvard T.H. Chan School of Public Health, Boston, MA, USA*

<sup>4</sup>*Center for Health Decision Science, Harvard T. H. Chan School of Public Health, Boston, MA, USA*

<sup>5</sup>*Department of Medical Biochemistry and Biophysics, Division of Physiological Chemistry 2, Karolinska Institute, Stockholm, Sweden*

### **Corresponding Author:**

Rachel S. Kelly, Ph.D.

Channing Division of Network Medicine

Department of Medicine

Brigham and Women's Hospital

181 Longwood Avenue, Boston, MA, 02115

Telephone: (617) 525-0065

Email: [hprke@channing.harvard.edu](mailto:hprke@channing.harvard.edu)

## Supplementary Materials

**Table S1: Cohort Demographics by Study Site**

| Study Site                                                       | Boston      | San Diego   | St.Louis    |
|------------------------------------------------------------------|-------------|-------------|-------------|
| <b>Total number of participants</b>                              | 128         | 157         | 174         |
| <b>Pre-pregnancy BMI kg/m<sup>2</sup>, Mean (SD)<sup>1</sup></b> | 30.1 (7.5)  | 27.2 (6.8)  | 29.5 (9.0)  |
| <b>Age at collection, Mean (SD)</b>                              | 27.0 (5.4)  | 30.3 (4.6)  | 25.1 (5.1)  |
| <b>Race</b>                                                      |             |             |             |
| <b>Black</b>                                                     | 74 ( 57.8)  | 3 ( 1.9)    | 127 ( 73.0) |
| White                                                            | 46 ( 35.9)  | 90 ( 57.3)  | 40 ( 23.0)  |
| <b>Other</b>                                                     | 8 ( 6.2)    | 64 ( 40.8)  | 7 ( 4.0)    |
| <b>Household Income Category, n (%)<sup>2</sup></b>              |             |             |             |
| Low                                                              | 62 ( 80.5)  | 42 ( 29.8)  | 90 ( 70.3)  |
| Medium                                                           | 13 ( 16.9)  | 68 ( 48.2)  | 25 ( 19.5)  |
| High                                                             | 2 ( 2.6)    | 31 ( 22.0)  | 13 ( 10.2)  |
| <b>Maternal Education Category, n (%)<sup>3</sup></b>            |             |             |             |
| <b>Low</b>                                                       | 102 ( 79.7) | 56 ( 35.7)  | 129 ( 74.1) |
| <b>Medium</b>                                                    | 19 ( 14.8)  | 65 ( 41.4)  | 26 ( 14.9)  |
| High                                                             | 7 ( 5.5)    | 36 ( 22.9)  | 19 ( 10.9)  |
| <b>Vitamin D Level at Time of Collection (ng/mL), Mean (SD)</b>  | 31.1 (12.4) | 35.6 (12.9) | 30.4 (15.4) |

<sup>1</sup>BMI in mothers was reported prior to pregnancy.

<sup>2</sup>Income was categorized based on reported household yearly income in USD: Low (<\$50,000/year), Medium (\$50,000-\$100,000/year), or High (>\$100,000/year)

<sup>3</sup>Maternal educational status was categorized based on maximum education level reported: Low (primary school, secondary school, or some college/junior college), Medium (technical/trade school or bachelor's degree), or High (graduate degree)

**Table S2: PFAS Levels Stratified by Study Site.**

| Study Site                                       |              | Boston<br>(n=128)             |                   |                                                   | San Diego<br>(n=157) |                                                   | St Louis<br>(n=174) |                                                   | ANOVA<br><i>q</i> <sup>a</sup> |
|--------------------------------------------------|--------------|-------------------------------|-------------------|---------------------------------------------------|----------------------|---------------------------------------------------|---------------------|---------------------------------------------------|--------------------------------|
| PFAS Analyte                                     | Abbreviation | Limit of Detection<br>(ng/ml) | Median<br>(ng/ml) | 25 <sup>th</sup> -75 <sup>th</sup><br>Percentiles | Median<br>(ng/ml)    | 25 <sup>th</sup> -75 <sup>th</sup><br>Percentiles | Median<br>(ng/ml)   | 25 <sup>th</sup> -75 <sup>th</sup><br>Percentiles |                                |
| 2-(N-methyl-perfluorooctane sulfonamido) acetate | ME-PFOA-ACOH | 0.1                           | 0.07              | 0.07,0.10                                         | 0.07                 | 0.07,0.10                                         | 0.10                | 0.07,0.30                                         | 9.27 x10 <sup>-5</sup> ***     |
| Perfluorohexane sulfonate                        | PFHXS        | 0.1                           | 0.60              | 0.40,1.00                                         | 0.90                 | 0.60,1.40                                         | 0.90                | 0.60,1.70                                         | 0.05*                          |
| n-Perfluorooctanoate                             | n-PFOA       | 0.1                           | 1.20              | 0.90,1.70                                         | 1.40                 | 1.10,2.00                                         | 1.10                | 0.80,1.60                                         | 1.18 x10 <sup>-5</sup> ***     |
| Sum of branched perfluorooctanoates <sup>c</sup> | Sb-PFOA      | 0.1                           | 0.07              | 0.07,0.07                                         | 0.07                 | 0.07,0.07                                         | 0.07                | 0.07,0.07                                         | 0.87                           |
| Perfluorodecanoate                               | PFDEA        | 0.1                           | 0.20              | 0.20,0.30                                         | 0.20                 | 0.20,0.30                                         | 0.20                | 0.10,0.20                                         | 1.17 x10 <sup>-6</sup> ***     |
| Perfluoroundecanoate                             | PFUA         | 0.1                           | 0.20              | 0.10,0.30                                         | 0.10                 | 0.07,0.20                                         | 0.10                | 0.07,0.20                                         | 3.96 x10 <sup>-7</sup> ***     |
| Perfluoromethylheptane sulfonates                | Sm-PFOS      | 0.1                           | 0.90              | 0.60,1.40                                         | 1.20                 | 0.80,1.70                                         | 1.10                | 0.72,1.50                                         | 2x10 <sup>-3</sup> **          |
| n-Perfluorooctane sulfonate                      | n-PFOS       | 0.1                           | 2.50              | 1.70,3.42                                         | 2.60                 | 1.80,3.60                                         | 2.95                | 2.20,3.80                                         | 0.64                           |
| Perfluorononanoate                               | PFNA         | 0.1                           | 0.60              | 0.40,0.80                                         | 0.50                 | 0.40,0.70                                         | 0.40                | 0.30,0.60                                         | 4.91 x10 <sup>-6</sup> ***     |
| <b>NASEM Total PFAS<sup>b</sup></b>              | -            | 0.1                           | 18.00             | 13.07,22.02                                       | 18.07                | 14.07,23.07                                       | 17.00               | 13.02,22.00                                       | 0.22                           |

<sup>a</sup> One-Way ANOVA, *q* value (\**q*<0.05, \*\**q*<0.01, \*\*\**q*<0.001).

<sup>b</sup> Cumulative sum of all PFAS (PFOA, n-PFOS and Sm-PFOS, PFHXS, PFNA, PFDEA, PFUA, ME-PFOA-ACOH), as per NASEM report guidelines.

**Table S3: Multivariate Logistic and Linear Regression results of PFAS plasma profiling associated with pregnancy and maternal health outcomes in VDAART mothers stratified by study site: Boston.**

| Boston VDAART pregnant mothers (32-38 weeks' gestation) and PFAS-Plasma profiling |                                                    |                    |                                            |                    |                                                |                    |                                       |                    |                                          |                    |                                          |                    |                                                |                    |  |
|-----------------------------------------------------------------------------------|----------------------------------------------------|--------------------|--------------------------------------------|--------------------|------------------------------------------------|--------------------|---------------------------------------|--------------------|------------------------------------------|--------------------|------------------------------------------|--------------------|------------------------------------------------|--------------------|--|
| PFAS Analyte                                                                      | Gestational Diabetes (n=2 cases, total cohort=128) |                    | Preeclampsia (n=2 cases, total cohort=128) |                    | Low Birth Weight (n=8 cases, total cohort=128) |                    | Gestational Weeks at Delivery (n=128) |                    | Birth-Weight-for-Gestational Age (n=128) |                    | Birth-Length-for-Gestational Age (n=128) |                    | Head-Circumference-for-Gestational Age (n=128) |                    |  |
|                                                                                   | OR (95%CI)                                         | FDR p <sup>a</sup> | OR (95%CI)                                 | FDR p <sup>a</sup> | OR (95%CI)                                     | FDR p <sup>a</sup> | β (95%CI)                             | FDR p <sup>a</sup> | β (95%CI)                                | FDR p <sup>a</sup> | β (95%CI)                                | FDR p <sup>a</sup> | β (95%CI)                                      | FDR p <sup>a</sup> |  |
| ME-PFOSA-ACOH                                                                     | - <sup>d</sup>                                     | -                  | -                                          | -                  | -                                              | -                  | 0.25 (-0.46, 0.96)                    | 0.62               | 0.12 (-0.46, 0.70)                       | 0.82               | 0.29 (-0.34, 0.91)                       | 0.87               | 0.15 (-0.57, 0.87)                             | 0.69               |  |
| PFOA                                                                              | -                                                  | -                  | -                                          | -                  | -                                              | -                  | -0.32 (-1.24, 0.6)                    | 0.62               | -0.36 (-1.11, 0.39)                      | 0.82               | 0.03 (-0.78, 0.85)                       | 0.96               | -0.75 (-1.66, 0.16)                            | 0.69               |  |
| PFOS                                                                              | -                                                  | -                  | -                                          | -                  | -                                              | -                  | -0.19 (-0.90, 0.51)                   | 0.62               | 0.29 (-0.28, 0.87)                       | 0.82               | 0.31 (-0.31, 0.92)                       | 0.87               | 0.17 (-0.54, 0.88)                             | 0.69               |  |
| PFDEA                                                                             | -                                                  | -                  | -                                          | -                  | -                                              | -                  | 0.19 (-0.57, 0.96)                    | 0.62               | 0.19 (-0.44, 0.82)                       | 0.82               | 0.12 (-0.56, 0.79)                       | 0.96               | 0.18 (-0.59, 0.96)                             | 0.69               |  |
| PFHXS                                                                             | -                                                  | -                  | -                                          | -                  | -                                              | -                  | -0.53 (-1.17, 0.10)                   | 0.41               | -0.14 (-0.67, 0.40)                      | 0.82               | -0.18 (-0.75, 0.40)                      | 0.87               | -0.16 (-0.82, 0.5)                             | 0.69               |  |
| PFNA                                                                              | -                                                  | -                  | -                                          | -                  | -                                              | -                  | -0.63 (-1.48, 0.22)                   | 0.41               | -0.37 (-1.07, 0.34)                      | 0.82               | -0.30 (-1.06, 0.46)                      | 0.87               | -0.57 (-1.43, 0.3)                             | 0.69               |  |
| PFUA                                                                              | -                                                  | -                  | -                                          | -                  | -                                              | -                  | 0.19 (-0.41, 0.80)                    | 0.62               | 0.04 (-0.46, 0.54)                       | 0.87               | -0.01 (-0.55, 0.52)                      | 0.96               | 0.35 (-0.26, 0.96)                             | 0.69               |  |
| Sm-PFOS                                                                           | -                                                  | -                  | -                                          | -                  | -                                              | -                  | -0.71 (-1.46, 0.05)                   | 0.41               | 0.12 (-0.52, 0.76)                       | 0.82               | 0.32 (-0.36, 1.00)                       | 0.87               | -0.37 (-1.16, 0.41)                            | 0.69               |  |
| Qg-comp Total PFAS <sup>b</sup>                                                   | -                                                  | -                  | -                                          | -                  | -                                              | -                  | 0.91 (0.58, 1.44)                     | 0.70               | 1.39 (1.01, 1.92)                        | 0.05*              | 1.34 (0.96, 1.88)                        | 0.09               | 1.15 (0.79, 1.68)                              | 0.47               |  |
| NASEM Total PFAS <sup>c</sup>                                                     | -                                                  | -                  | -                                          | -                  | -                                              | -                  | -0.43 (-1.55, 0.68)                   | 0.62               | 0.13 (-0.79, 1.05)                       | 0.87               | 0.26 (-0.73, 1.25)                       | 0.91               | -0.06 (-1.20, 1.07)                            | 0.91               |  |

<sup>a</sup>p value corrected for multiple testing (\*p<0.05, FDR, Benjamini-Hochberg). Models adjusted for maternal age, BMI, site, socioeconomic factors, maternal alcohol use, household smoking, parity, vitamin D level and race. Gestational diabetes, preeclampsia and low birth weight models are also adjusted for gestational age.

<sup>b</sup> Calculated by Quantile-based g-computation (Qg-comp) of all PFAS (>50% LoD threshold) as a cumulative measure of Total PFAS.

<sup>c</sup>Cumulative sum of all PFAS (PFOA, n-PFOS and Sm-PFOS, PFHXS, PFNA, PFDEA, PFUA, ME-PFOSA-ACOH), as per NASEM report guidelines.

<sup>d</sup> Models do not converge due to low number of cases of gestational diabetes and preterm birth from the Boston site.

**Table S4: Multivariate Logistic and Linear Regression results of PFAS plasma profiling associated with pregnancy and maternal health outcomes in VDAART mothers stratified by study site: San Diego**

| San Diego VDAART pregnant mothers (32-38 weeks' gestation) and PFAS-Plasma profiling |                                                     |                    |                                            |                    |                                                |                    |                                       |                    |                                          |                    |                                          |                    |                                                |                    |
|--------------------------------------------------------------------------------------|-----------------------------------------------------|--------------------|--------------------------------------------|--------------------|------------------------------------------------|--------------------|---------------------------------------|--------------------|------------------------------------------|--------------------|------------------------------------------|--------------------|------------------------------------------------|--------------------|
| PFAS Analyte                                                                         | Gestational Diabetes (n=15 cases, total cohort=157) |                    | Preeclampsia (n=7 cases, total cohort=157) |                    | Low Birth Weight (n=5 cases, total cohort=157) |                    | Gestational Weeks at Delivery (n=157) |                    | Birth-Weight-for-Gestational Age (n=157) |                    | Birth-Length-for-Gestational Age (n=157) |                    | Head-Circumference-for-Gestational Age (n=157) |                    |
|                                                                                      | OR (95%CI)                                          | FDR p <sup>a</sup> | OR (95%CI)                                 | FDR p <sup>a</sup> | OR (95%CI)                                     | FDR p <sup>a</sup> | β (95%CI)                             | FDR p <sup>a</sup> | β (95%CI)                                | FDR p <sup>a</sup> | β (95%CI)                                | FDR p <sup>a</sup> | β (95%CI)                                      | FDR p <sup>a</sup> |
| ME-PFOSA-ACOH                                                                        | 1.28 (0.55, 3.01)                                   | 0.84               | - <sup>d</sup>                             | -                  | -                                              | -                  | 0.07 (-0.33, 0.47)                    | 0.81               | 0.20 (-0.07, 0.48)                       | 0.59               | 0.09 (-0.15, 0.33)                       | 0.98               | 0.22 (-0.12, 0.55)                             | 0.30               |
| PFOA                                                                                 | 0.83 (0.22, 3.16)                                   | 0.90               | -                                          | -                  | -                                              | -                  | 0.46 (-0.04, 0.97)                    | 0.15               | 0.10 (-0.26, 0.46)                       | 0.70               | 0.11 (-0.20, 0.42)                       | 0.98               | 0.03 (-0.41, 0.47)                             | 0.90               |
| PFOS                                                                                 | 0.42 (0.09, 2.04)                                   | 0.76               | -                                          | -                  | -                                              | -                  | 0.20 (-0.36, 0.76)                    | 0.77               | -0.17 (-0.57, 0.22)                      | 0.70               | -0.04 (-0.38, 0.3)                       | 0.98               | -0.40 (-0.87, 0.07)                            | 0.30               |
| PFDEA                                                                                | 0.25 (0.06, 0.97)                                   | 0.36               | -                                          | -                  | -                                              | -                  | 0.63 (0.12, 1.13)                     | 0.07 <sup>§</sup>  | 0.09 (-0.27, 0.46)                       | 0.70               | -0.02 (-0.34, 0.29)                      | 0.98               | 0.29 (-0.15, 0.73)                             | 0.30               |
| PFHXS                                                                                | 1.24 (0.51, 3.05)                                   | 0.84               | -                                          | -                  | -                                              | -                  | -0.04 (-0.39, 0.3)                    | 0.81               | -0.22 (-0.45, 0.02)                      | 0.59               | -0.17 (-0.38, 0.04)                      | 0.86               | -0.36 (-0.65, -0.07)                           | 0.12               |
| PFNA                                                                                 | 0.98 (0.26, 3.64)                                   | 0.97               | -                                          | -                  | -                                              | -                  | 0.49 (0.00, 0.98)                     | 0.13               | 0.05 (-0.30, 0.40)                       | 0.78               | 0.00 (-0.30, 0.31)                       | 0.98               | 0.24 (-0.18, 0.67)                             | 0.30               |
| PFUA                                                                                 | 0.31 (0.07, 1.28)                                   | 0.42               | -                                          | -                  | -                                              | -                  | 0.60 (0.18, 1.02)                     | 0.05*              | 0.08 (-0.22, 0.39)                       | 0.70               | -0.12 (-0.38, 0.14)                      | 0.98               | 0.22 (-0.14, 0.59)                             | 0.30               |
| Sm-PFOS                                                                              | 0.59 (0.15, 2.31)                                   | 0.84               | -                                          | -                  | -                                              | -                  | 0.10 (-0.41, 0.61)                    | 0.81               | -0.16 (-0.51, 0.19)                      | 0.70               | -0.01 (-0.32, 0.30)                      | 0.98               | -0.30 (-0.73, 0.13)                            | 0.30               |
| Qg-comp Total PFAS <sup>b</sup>                                                      | 1.19 (0.34, 4.23)                                   | 0.78               | -                                          | -                  | -                                              | -                  | 1.02 (0.72, 1.45)                     | 0.91               | 1.09 (0.86, 1.41)                        | 0.46               | 1.05 (0.83, 1.33)                        | 0.70               | 0.89 (0.66, 1.21)                              | 0.46               |
| NASEM Total PFAS <sup>c</sup>                                                        | 0.47 (0.08, 2.57)                                   | 0.81               | -                                          | -                  | -                                              | -                  | 0.90 (0.19, 1.60)                     | 0.06               | 0.06 (-0.45, 0.56)                       | 0.82               | -0.04 (-0.47, 0.40)                      | 0.98               | 0.03 (-0.58, 0.65)                             | 0.91               |

<sup>a</sup>p value corrected for multiple testing (\*p<0.05, FDR, Benjamini-Hochberg). Models adjusted for maternal age, BMI, site, socioeconomic factors, maternal alcohol use, household smoking, parity, vitamin D level and race. Gestational diabetes, preeclampsia and low birth weight models are also adjusted for gestational age.

<sup>b</sup> Calculated by Quantile-based g-computation (Qg-comp) of all PFAS (>50% LoD threshold) as a cumulative measure of Total PFAS.

<sup>c</sup>Cumulative sum of all PFAS (PFOA, n-PFOS and Sm-PFOS, PFHXS, PFNA, PFDEA, PFUA, ME-PFOSA-ACOH), as per NASEM report guidelines.

<sup>d</sup> Models do not converge due to low number of cases of preeclampsia from the San Diego site.

<sup>§</sup> These p values were nominally significant (<0.05) prior to multiple correction testing.

**Table S5: Multivariate Logistic and Linear Regression results of PFAS plasma profiling associated with pregnancy and maternal health outcomes in VDAART mothers stratified by study site: St Louis**

| St Louis VDAART pregnant mothers (32-38 weeks' gestation) and PFAS-Plasma profiling |                                                    |                    |                                            |                    |                                                 |                    |                                       |                    |                                          |                    |                                          |                    |                                                |                    |
|-------------------------------------------------------------------------------------|----------------------------------------------------|--------------------|--------------------------------------------|--------------------|-------------------------------------------------|--------------------|---------------------------------------|--------------------|------------------------------------------|--------------------|------------------------------------------|--------------------|------------------------------------------------|--------------------|
| PFAS Analyte                                                                        | Gestational Diabetes (n=7 cases, total cohort=174) |                    | Preeclampsia (n=7 cases, total cohort=174) |                    | Low Birth Weight (n=17 cases, total cohort=174) |                    | Gestational Weeks at Delivery (n=174) |                    | Birth-Weight-for-Gestational Age (n=174) |                    | Birth-Length-for-Gestational Age (n=174) |                    | Head-Circumference-for-Gestational Age (n=174) |                    |
|                                                                                     | OR (95%CI)                                         | FDR p <sup>a</sup> | OR (95%CI)                                 | FDR p <sup>a</sup> | OR (95%CI)                                      | FDR p <sup>a</sup> | β (95%CI)                             | FDR p <sup>a</sup> | β (95%CI)                                | FDR p <sup>a</sup> | β (95%CI)                                | FDR p <sup>a</sup> | β (95%CI)                                      | FDR p <sup>a</sup> |
| ME-PFOSA-ACOH                                                                       | - <sup>d</sup>                                     | -                  | -                                          | -                  | 1.17 (0.16, 8.68)                               | 0.96               | -0.08 (-0.44, 0.29)                   | 0.88               | -0.06 (-0.30, 0.19)                      | 0.84               | -0.20 (-0.48, 0.07)                      | 0.92               | -0.12 (-0.41, 0.17)                            | 0.56               |
| PFOA                                                                                | -                                                  | -                  | -                                          | -                  | 0.06 (0.00, 12.55)                              | 0.95               | -0.10 (-0.56, 0.36)                   | 0.88               | -0.05 (-0.36, 0.26)                      | 0.84               | -0.09 (-0.44, 0.26)                      | 0.92               | 0.13 (-0.24, 0.49)                             | 0.56               |
| PFOS                                                                                | -                                                  | -                  | -                                          | -                  | 0.01 (0.00, 3.08)                               | 0.89               | 0.18 (-0.43, 0.80)                    | 0.88               | 0.20 (-0.21, 0.62)                       | 0.84               | 0.07 (-0.40, 0.54)                       | 0.92               | 0.15 (-0.35, 0.65)                             | 0.56               |
| PFDEA                                                                               | -                                                  | -                  | -                                          | -                  | 0.52 (0.02, 16.57)                              | 0.95               | 0.07 (-0.50, 0.63)                    | 0.88               | 0.11 (-0.28, 0.49)                       | 0.84               | 0.06 (-0.38, 0.49)                       | 0.92               | 0.14 (-0.32, 0.61)                             | 0.56               |
| PFHXS                                                                               | -                                                  | -                  | -                                          | -                  | 0.21 (0.00, 12.81)                              | 0.95               | -0.24 (-0.62, 0.14)                   | 0.88               | 0.03 (-0.23, 0.29)                       | 0.84               | 0.02 (-0.27, 0.32)                       | 0.92               | 0.18 (-0.13, 0.48)                             | 0.56               |
| PFNA                                                                                | -                                                  | -                  | -                                          | -                  | 1.13 (0.01, 117.23)                             | 0.96               | 0.28 (-0.32, 0.88)                    | 0.88               | 0.32 (-0.08, 0.72)                       | 0.84               | 0.12 (-0.34, 0.58)                       | 0.92               | 0.42 (-0.06, 0.90)                             | 0.56               |
| PFUA                                                                                | -                                                  | -                  | -                                          | -                  | 0.23 (0.00, 60.03)                              | 0.95               | -0.20 (-0.87, 0.47)                   | 0.88               | 0.05 (-0.41, 0.50)                       | 0.84               | -0.03 (-0.55, 0.49)                      | 0.92               | -0.18 (-0.72, 0.37)                            | 0.56               |
| Sm-PFOS                                                                             | -                                                  | -                  | -                                          | -                  | 0.50 (0.01, 16.78)                              | 0.95               | 0.04 (-0.51, 0.59)                    | 0.88               | 0.12 (-0.26, 0.50)                       | 0.84               | 0.02 (-0.41, 0.46)                       | 0.92               | 0.27 (-0.19, 0.72)                             | 0.56               |
| Qg-comp Total PFAS <sup>b</sup>                                                     | -                                                  | -                  | -                                          | -                  | 1.14 (0.57, 2.27)                               | 0.72               | 0.98 (0.64, 1.50)                     | 0.91               | 1.20 (0.92, 1.58)                        | 0.18               | 0.87 (0.64, 1.20)                        | 0.41               | 1.11 (0.79, 1.56)                              | 0.54               |
| NASEM Total PFAS <sup>c</sup>                                                       | -                                                  | -                  | -                                          | -                  | 0.86 (0.04, 138.21)                             | 0.87               | 0.09 (-0.69, 0.87)                    | 0.88               | 0.24 (-0.30, 0.77)                       | 0.84               | 0.04 (-0.57, 0.65)                       | 0.92               | 0.18 (-0.46, 0.82)                             | 0.58               |

<sup>a</sup>p value corrected for multiple testing (\*p<0.05, FDR, Benjamini-Hochberg). Models adjusted for maternal age, BMI, site, socioeconomic factors, maternal alcohol use, household smoking, parity, vitamin D level and race. Gestational diabetes, preeclampsia and low birth weight models are also adjusted for gestational age.

<sup>b</sup> Calculated by Quantile-based g-computation (Qg-comp) of all PFAS (>50% LoD threshold) as a cumulative measure of Total PFAS.

<sup>c</sup>Cumulative sum of all PFAS (PFOA, n-PFOS and Sm-PFOS, PFHXS, PFNA, PFDEA, PFUA, ME-PFOSA-ACOH), as per NASEM report guidelines.

<sup>d</sup> Models do not converge due to low number of cases of preeclampsia from the St. Louis site.
